# Supplementary material
Source: bioRxiv or medRxiv preprint supplement (https://www.biorxiv.org/highwire/filestream/15461/field_highwire_adjunct_files/1/055848-2.pdf)
Supplement: Supplementary file [file 055848-2.pdf]

**Table S7.**

|                                             | Genetic ID | Relatedness Coefficient | Tested Population | Sister Clones |         |       | Non-sister Clone         |         |       |                 |          | Statistics |          |          |
|---------------------------------------------|------------|-------------------------|-------------------|---------------|---------|-------|--------------------------|---------|-------|-----------------|----------|------------|----------|----------|
|                                             |            |                         |                   | Raw SOP       | Avg SOP | SD    | Raw SOP                  | Avg SOP | SD    | Population      | Geo Dist | N          | <i>t</i> | <i>P</i> |
| familiar sister/<br>unfamiliar non-sister   | 0.825      | 0.454                   | C101              | 594.970       | 0.751   | 0.096 | 501.543                  | 0.691   | 0.097 | San Ignacio     | 573      | 25         | 1.567    | 0.13     |
|                                             | 0.986      | -0.264                  | Comal Spring 8b   | 607.777       | 0.903   | 0.154 | 241.905                  | 0.509   | 0.188 | VI/17           | 635      | 18         | 5.989    | < 0.0001 |
|                                             | 0.997      | -0.279                  | III/9             | 657.039       | 0.852   | 0.187 | 330.409                  | 0.566   | 0.204 | Comal Spring 8b | 634.1    | 16         | 3.484    | 0.003    |
|                                             | 1.000      | -0.072                  | Comal Spring 7a   | 841.307       | 0.941   | 0.152 | 276.123                  | 0.461   | 0.205 | III/9           | 634.1    | 15         | 5.213    | < 0.0001 |
|                                             | 1.000      | 0.752                   | Comal Spring 7a   | 823.536       | 0.946   | 0.107 | 244.027                  | 0.463   | 0.137 | Comal Spring 8b | 0        | 10         | 6.266    | < 0.0001 |
|                                             | 0.992      | -0.057                  | VI/17             | 767.287       | 0.914   | 0.099 | 272.440                  | 0.505   | 0.126 | Comal Spring 7a | 635      | 15         | 7.258    | < 0.0001 |
|                                             | 1.000      | 1.000                   | San Ignacio       | 884.374       | 0.976   | 0.040 | 202.520                  | 0.431   | 0.052 | Comal Spring 7a | 552.8    | 5          | 13.279   | < 0.0001 |
|                                             | 1.000      | -0.684                  | Weslaco           | 682.300       | 0.886   | 0.218 | 287.936                  | 0.518   | 0.252 | San Ignacio     | 196.2    | 10         | 2.491    | 0.034    |
|                                             | 1.000      | -0.264                  | Weslaco           | 745.248       | 0.929   | 0.080 | 241.126                  | 0.488   | 0.099 | VI/17           | 249.8    | 9          | 7.389    | < 0.0001 |
|                                             | 1.000      | -0.684                  | Weslaco           | 820.523       | 0.980   | 0.112 | 192.276                  | 0.418   | 0.159 | Comal Spring 7a | 399.8    | 9          | 6.225    | < 0.0001 |
| unfamiliar sister/<br>unfamiliar non-sister | 1.000      | -0.072                  | Comal Spring 7a   | 663.391       | 0.850   | 0.201 | 267.998                  | 0.566   | 0.197 | III/9           | 634.1    | 15         | 3.362    | 0.005    |
| familiar sister/<br>unfamiliar sister       |            |                         |                   |               |         |       | Unfamiliar Sister clones |         |       |                 |          |            |          |          |
|                                             | 1.000      | 1.000                   | Comal Spring 7a   | 650.201       | 0.891   | 0.199 | 299.816                  | 0.513   | 0.255 | -               | -        | 14         | 2.966    | 0.011    |

**Table S7. Kin Preference Scores From Multiple Populations and Pairings.** The strength of preference score (SOP) for several different clonal pairs including: the focal population’s genetic identity; the relatedness coefficient between the focal population and the non-sister stimulus population; the raw preference (s), average SOP and standard deviation for a preference towards the clonal sisters; the raw preference (s), average SOP and standard deviation for a preference towards the non-sister clones; the geographical distance between the two population lineages; and the sample size, *t*-score, and *p*-value from the *t*-tests. Pairs were familiar clonal sister and unfamiliar non-sister, unfamiliar clonal sister and unfamiliar non-sister, or familiar clonal sister and unfamiliar clonal sister
